# Supplementary material for: Zinc alloyed iron pyrite ternary nanocrystals for band gap broadening
Source: Royal Society of Chemistry journal article supplement (doi:10.1039/c3ta11039g), 2013-01-01
Supplement: c3ta11039g.pdf [file c3ta11039g.pdf]

## Supporting Information

# Zinc Alloyed Iron Pyrite Ternary Nanocrystals for Band Gap Broadening

Baodong Mao,<sup>a</sup> Qingfeng Dong,<sup>a</sup> Zhengguo Xiao,<sup>a</sup> Christopher L. Exstrom,<sup>b</sup> Scott A. Darveau,<sup>b</sup>  
Thomas E. Webber,<sup>b</sup> Bjorn D. Lund,<sup>b</sup> Hui Huang,<sup>c</sup> Zhenhui Kang,<sup>c</sup> and Jinsong Huang<sup>\*a</sup>

<sup>a</sup> Department of Mechanical and Materials Engineering, University of Nebraska—Lincoln, Lincoln, Nebraska 68588, United States. Fax: +1-4024721465; Tel: +1-4024722640; E-mail: jhuang2@unl.edu

<sup>b</sup> Department of Chemistry, University of Nebraska at Kearney, Kearney, Nebraska 68849, United States.

<sup>c</sup> Institute of Functional Nano and Soft Materials (FUNSOM), Jiangsu Key Laboratory for Carbon-Based Functional Materials and Devices, Soochow University, Suzhou, China.

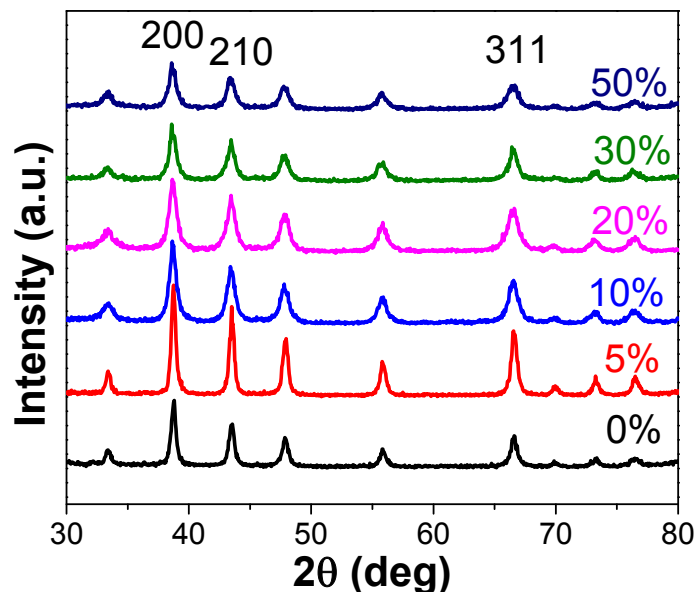

**Fig. S1** Full range XRD patterns of the Zn<sub>x</sub>Fe<sub>1-x</sub>S<sub>2</sub> NCs synthesized with different starting ratio of zinc in the precursors.

**Table S1.** Summarized diffraction angles ( $2\theta$ ), crystal plane distances ( $d$ ), and lattice parameters ( $a_0$ ).

| Zn <sub>s</sub> | (2θ) <sub>200</sub> /° | (2θ) <sub>210</sub> /° | (2θ) <sub>311</sub> /° | d <sub>200</sub> /Å | d <sub>210</sub> /Å | d <sub>311</sub> /Å | a <sub>0</sub> /Å |
|-----------------|------------------------|------------------------|------------------------|---------------------|---------------------|---------------------|-------------------|
| 0%              | 38.8                   | 43.55                  | 66.6                   | 2.695               | 2.413               | 1.631               | 5.399             |
| 5%              | 38.75                  | 43.5                   | 66.55                  | 2.699               | 2.416               | 1.632               | 5.404             |
| 10%             | 38.65                  | 43.45                  | 66.55                  | 2.705               | 2.419               | 1.632               | 5.410             |
| 20%             | 38.65                  | 43.45                  | 66.60                  | 2.705               | 2.419               | 1.631               | 5.409             |
| 30%             | 38.6                   | 43.45                  | 66.40                  | 2.709               | 2.419               | 1.635               | 5.416             |
| 50%             | 38.6                   | 43.4                   | 66.35                  | 2.709               | 2.421               | 1.636               | 5.419             |

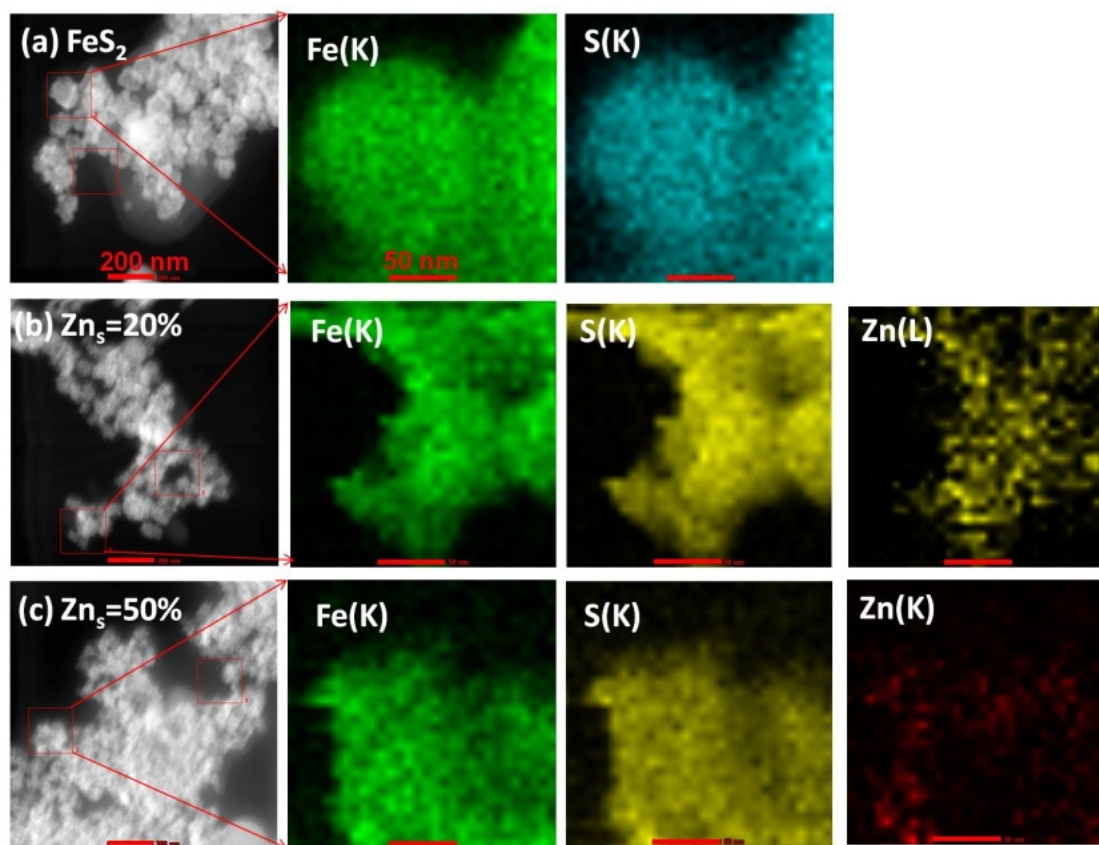

**Fig. S2** STEM images and elemental mapping of the Zn<sub>x</sub>Fe<sub>1-x</sub>S<sub>2</sub> NCs synthesized with starting zinc ratio Zn<sub>s</sub>=0% (a), 20% (b) and 50% (c). The scale bars are 200 nm for the STEM images and 50 nm for the mapping, respectively.

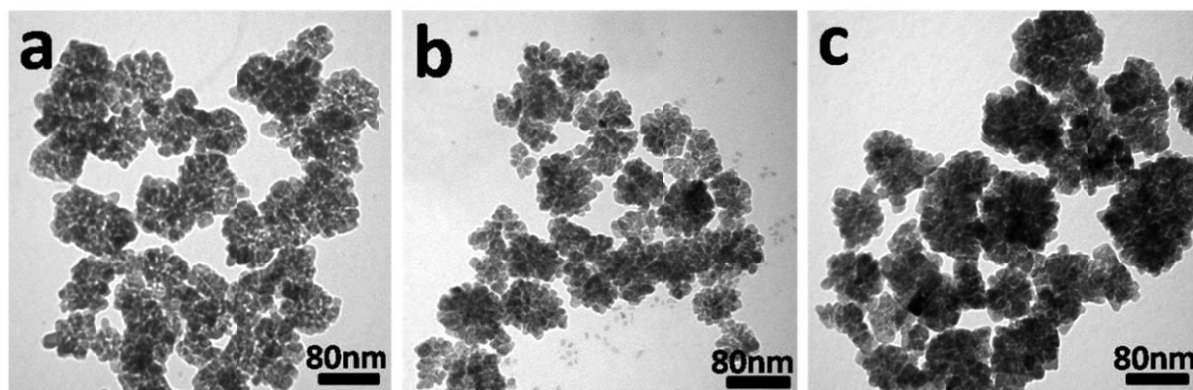

**Fig. S3** TEM images of the  $Zn_xFe_{1-x}S_2$  NCs synthesized using zinc acetate and 1 mmol of (Fe+Zn): (a)  $Zn_s=0\%$ , (b)  $Zn_s=10\%$ , and (c)  $Zn_s=20\%$ .

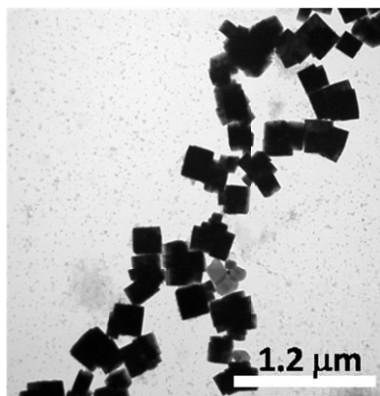

**Fig. S4** TEM image of the  $Zn_xFe_{1-x}S_2$  NCs synthesized with S injected at 170 °C and 10 at% zinc stearate.
